# Supplementary material for: Response of dust emissions in southwestern North America to 21st century trends in climate, CO 2 fertilization, and land use: Implications for air quality
Source: Copernicus journal article supplement (doi:10.5194/acp-2020-311), 2020-04-15
Supplement: Supplementary file 1 [file acp-2020-311-supplement.pdf]

1 Supplementary material

2

3 **Response of dust emissions in southwestern North America to 21<sup>st</sup>**  
4 **century trends in climate, CO<sub>2</sub> fertilization, and land use:**  
5 **Implications for air quality**

6 Yang Li<sup>1</sup>, Loretta J. Mickley<sup>1</sup>, Jed O. Kaplan<sup>2</sup>

7 <sup>1</sup>John A. Paulson School of Engineering and Applied Sciences, Harvard University, Cambridge,  
8 MA, USA

9 <sup>2</sup>Department of Earth Sciences, The University of Hong Kong, Hong Kong, China

10 *Correspondence to:* Yang Li ([yangli@seas.harvard.edu](mailto:yangli@seas.harvard.edu))

11

12

13

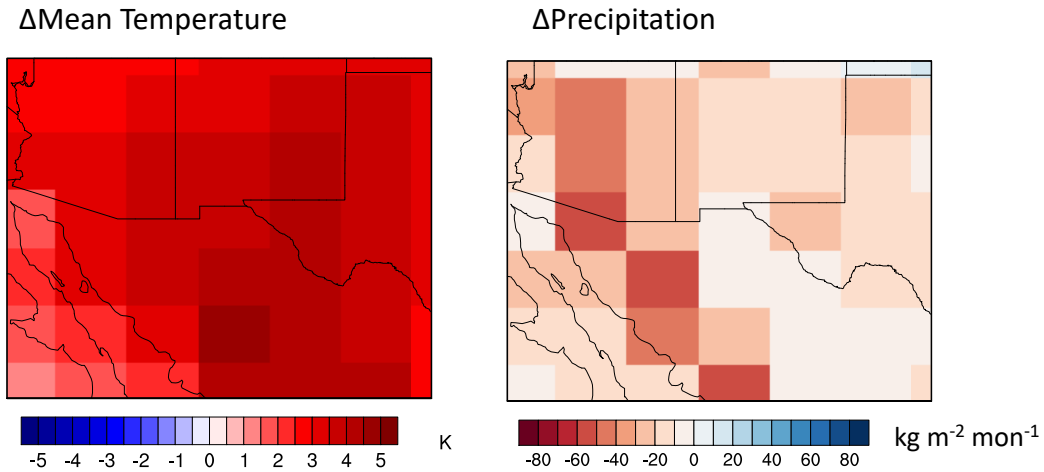

14

15 **Figure S1.** GISS-E2-R simulated spring averaged monthly mean temperature and precipitation  
16 in southwestern North America for RCP8.5. Changes are between the present day and 2100, with  
17 five years representing each time period. The color bar is reversed for precipitation, with redder  
18 colors indicated drier conditions.

19

### 20 **Evaluation of dust emissions based on LPJ-LMfire**

21 Figure S2 shows the simulated present-day (2011-2015) distribution of VAI over the  
22 southwestern U.S. Values are derived from LAI generated by the LPJ-LMfire dynamic vegetation  
23 model. We find relatively high VAI values in central Arizona, northern New Mexico, northern  
24 Texas, and northwestern Mexico, but near-zero VAI in the arid regions of western Texas and along  
25 the northern Mexico border. Correspondingly high dust emissions are simulated over these areas  
26 in spring.

27 We apply these emissions to GEOS-Chem and evaluate the resulting fine dust  
28 concentrations using ground-based measurements from the Interagency Monitoring of Protected  
29 Visual Environments (IMPROVE) network (Malm et al., 2004). Hand et al., 2016 used the

30 observed iron content from IMPROVE as a proxy for fine dust concentrations, and approximated  
31 soil-derived PM<sub>2.5</sub> as PM<sub>2.5</sub>-Iron/0.058. IMPROVE dust observations are made every three days,  
32 and we show the spatial or temporal median of these observations as outliers are common in the  
33 dataset, and GEOS-Chem is unlikely to capture the extreme dust events. For model validation, we  
34 rely on the RCP8.5 results for 2011-2015, which yields nearly identical results as RCP4.5. GEOS-  
35 Chem tracks fine dust with a diameter range of 0.2-2.0 μm, while the IMPROVE approximation  
36 yields dust concentrations with diameter less than 2.5 μg m<sup>-3</sup>. This disparity may hinder the model  
37 comparison with observations.

38 Figure S3 compares the spatial distribution of GEOS-Chem springtime dust concentrations  
39 with observations, and Figure S4 examines the temporal variability of modeled and observed dust  
40 averaged over the region. In general, the model captures both the observed spatial and temporal  
41 variability, though GEOS-Chem underestimates dust at a few sites in Arizona. This underestimate  
42 could be a result of abundant mountain vegetation simulated by LPJ that alleviates dust generation  
43 from persistently arid or desert regions. The 2011-2015 timeseries of observed and modeled dust  
44 (Figure S4) reveals that GEOS-Chem exhibits a smaller seasonal variation of 0.2-3.1 μg m<sup>-3</sup>,  
45 compared with the observed range of 0.2-8.1 μg m<sup>-3</sup>. Overall, we find that the present-day  
46 simulations reasonably reproduce observed fine dust over southwestern North America.

47

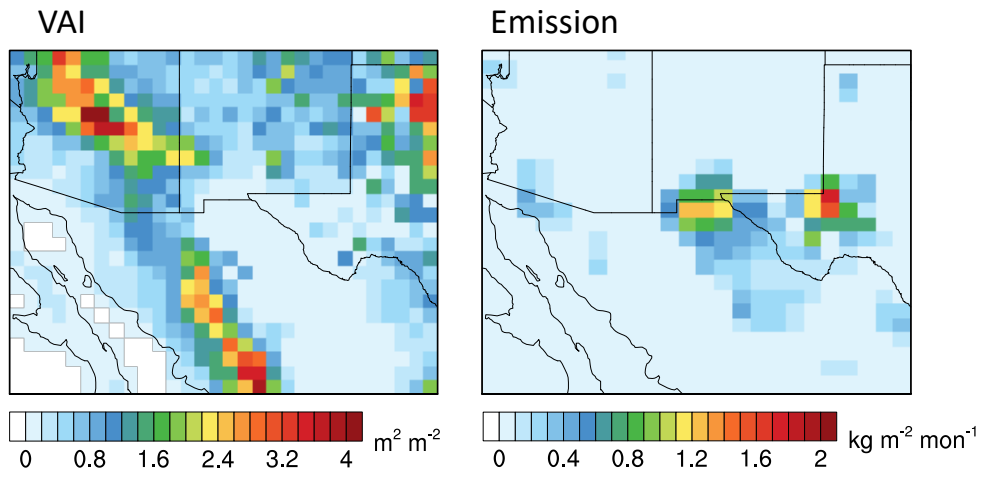

48  
49  
50  
51  
52  
53  
54

**Figure S2.** Present-day (2011-2015) spring averaged VAI and fine dust emissions for the RCP8.5 fixed-CO<sub>2</sub> scenario in southwestern North America, in which CO<sub>2</sub> fertilization is neglected. VAI results are from LPJ-LMfire. Dust emissions are generated offline using the GEOS-Chem emission component (HEMCO).

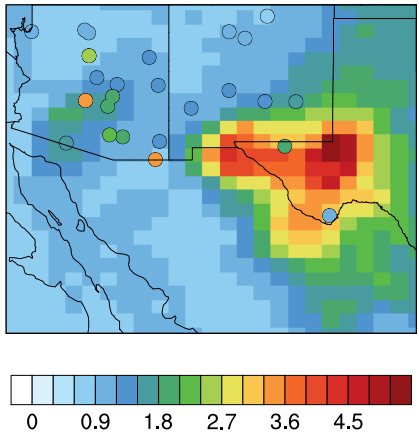

55  
56  
57  
58  
59

**Figure S3.** Spring fine dust concentration. Circles represent ground-based observations from the IMPROVE network, shown as the medians at each site over 2011-2015. The colored background is from GEOS-Chem simulations with the present-day (2011-2015) fine dust emissions for the RCP8.5 fixed-CO<sub>2</sub> scenario at 0.5° x 0.625° spatial resolution.

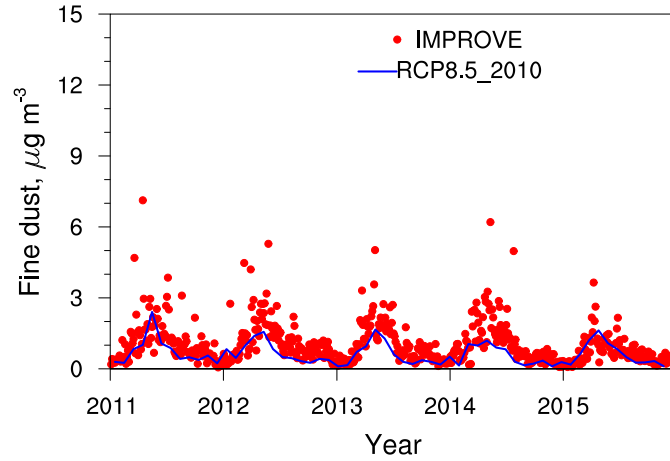

60

61 **Figure S4.** Seasonal cycle of GEOS-Chem simulated and IMPROVE observed fine dust  
62 concentrations, shown as the medians over southwestern North America from 2011 to 2015. The  
63 red dots represent the median of IMPROVE observations taken over all sites in the region at each  
64 measurement timestep. IMPROVE has a measurement frequency of every three days. The solid  
65 line shows GEOS-Chem simulated variations at  $0.5^\circ \times 0.625^\circ$  resolution for the 2010 time slice  
66 for the RCP8.5 fixed- $\text{CO}_2$  scenario.

67

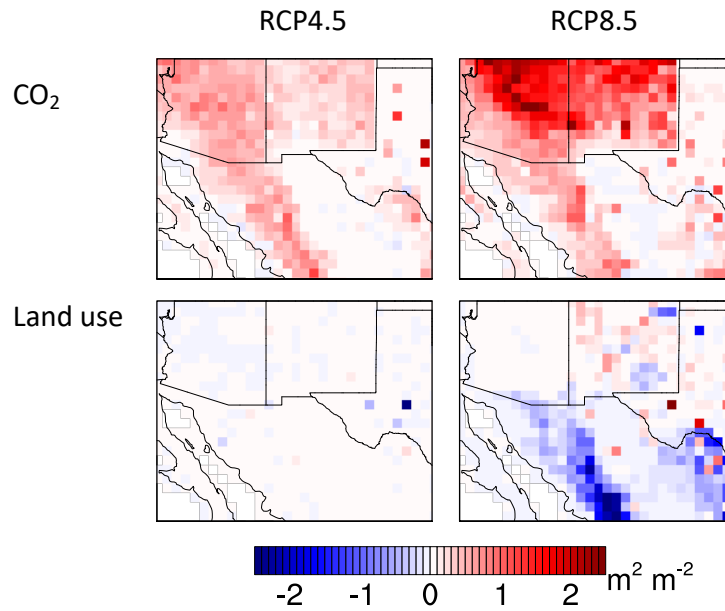

68

69 **Figure S5.** Contributions of CO<sub>2</sub> fertilization and anthropogenic land use to changes in VAI in  
70 spring in southwestern North America for RCP4.5 and RCP8.5. Changes are between the present  
71 day and 2100, with five years representing each time period. The top row is for CO<sub>2</sub> fertilization,  
72 and the bottom row is for land use trends. Results are from LPJ-LMfire.

73

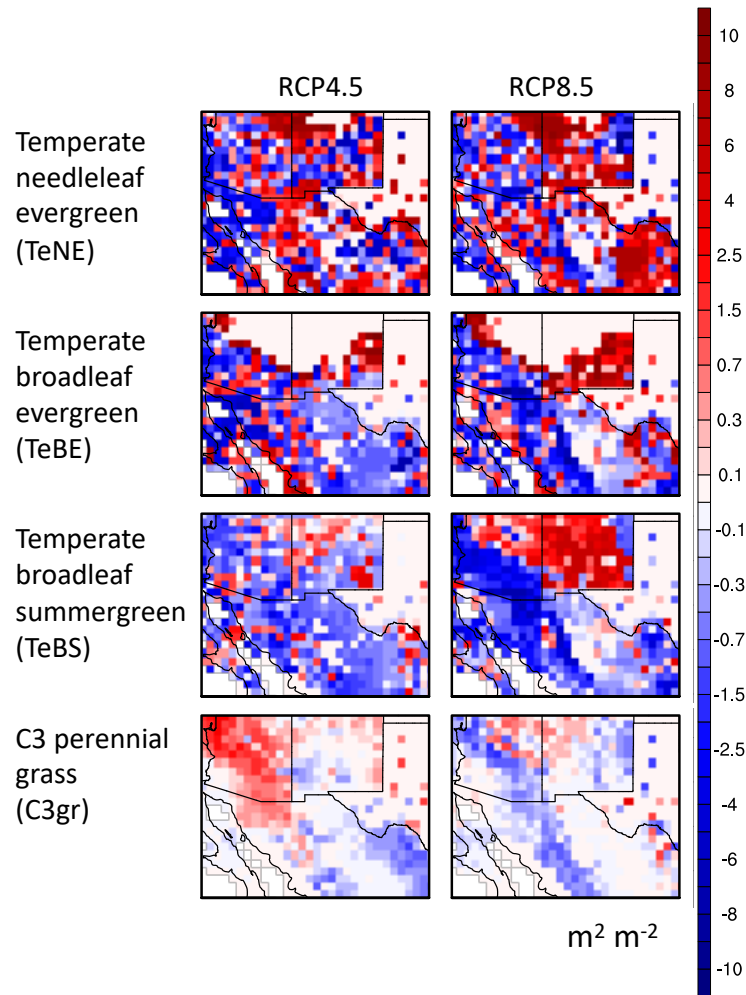

74

75 **Figure S6.** Simulated changes in springtime averaged LAI for the four dominant plant functional  
 76 types (PFTs) in southwestern North America under RCP4.5 and RCP8.5 for the fixed- $CO_2$   
 77 condition, in which  $CO_2$  fertilization is neglected. Changes are between the present day and 2100,  
 78 with five years representing each time period. Increments in the color bar are unevenly distributed.  
 79 Results are from LPJ-LMfire.

80

81

82

83

84 **References**

- 85 Hand, J., White, W., Gebhart, K., Hyslop, N., Gill, T., and Schichtel, B.: Earlier onset of the spring  
86 fine dust season in the southwestern United States, *Geophysical Research Letters*, 43, 4001-  
87 4009, 2016.
- 88 Malm, W. C., Schichtel, B. A., Pitchford, M. L., Ashbaugh, L. L., and Eldred, R. A.: Spatial and  
89 monthly trends in speciated fine particle concentration in the United States, *Journal of*  
90 *Geophysical Research: Atmospheres*, 109, 2004.
- 91
